# Supplementary material for: Synthesis and Biological Evaluation of Thiazole-Based Derivatives as Potential Acetylcholinesterase Inhibitors
Source: PubMed Central journal article supplement — ACS Omega. 2021 Jul 19;6(29):19202–11. doi: 10.1021/acsomega.1c02549 (PMC8320107; doi:10.1021/acsomega.1c02549), 2021-07-19
Supplement: ao1c02549_si_001.pdf [file ao1c02549_si_001.pdf]

## Supporting Information

### Synthesis and Biological Evaluation of Thiazole-Based Derivatives as Potential Acetylcholinesterase Inhibitors

**Aya Y. Hemaida,<sup>a</sup> Ghada S. Hassan,<sup>a</sup> Azza R. Maarouf,<sup>a</sup> Jacques Joubert,<sup>b</sup> and Ali A. El-Emam<sup>a\*</sup>**

<sup>a</sup> Department of Medicinal Chemistry, Faculty of Pharmacy, Mansoura University, Mansoura 35516, Egypt

<sup>b</sup> Pharmaceutical Chemistry, School of Pharmacy, University of the Western Cape, Private Bag X17, Bellville 7535, South Africa

**Table S1.** Molecular formulae, molecular weights and elemental analyses data of compounds **8, 10-21, 23, 24** and **26-33**.

| Comp. No. | Mol. Formula (Mol. Wt.)                                                                               | Analysis: % Calcd. (Found) |             |               |               |
|-----------|-------------------------------------------------------------------------------------------------------|----------------------------|-------------|---------------|---------------|
|           |                                                                                                       | C                          | H           | N             | S             |
| <b>8</b>  | C <sub>21</sub> H <sub>17</sub> N <sub>3</sub> OS <sub>2</sub> (391.51)                               | 64.42 (64.38)              | 4.38 (4.40) | 10.73 (10.71) | 16.38 (16.35) |
| <b>10</b> | C <sub>22</sub> H <sub>19</sub> N <sub>3</sub> O <sub>3</sub> S <sub>2</sub> (437.53)                 | 60.39 (60.21)              | 4.38 (4.41) | 9.60 (9.57)   | 14.66 (14.66) |
| <b>12</b> | C <sub>20</sub> H <sub>13</sub> Cl <sub>2</sub> N <sub>3</sub> OS <sub>2</sub> (446.37)               | 53.81 (53.88)              | 2.94 (3.01) | 9.41 (9.38)   | 14.37 (14.25) |
| <b>13</b> | C <sub>18</sub> H <sub>13</sub> N <sub>3</sub> OS <sub>3</sub> (383.51)                               | 56.37 (56.23)              | 3.42 (3.43) | 10.96 (10.70) | 25.08 (25.12) |
| <b>14</b> | C <sub>18</sub> H <sub>12</sub> BrN <sub>3</sub> OS <sub>3</sub> (462.41)                             | 46.75 (46.70)              | 2.62 (2.63) | 9.09 (9.0)    | 20.80 (20.77) |
| <b>15</b> | C <sub>21</sub> H <sub>17</sub> N <sub>3</sub> O <sub>2</sub> S <sub>2</sub> (407.51)                 | 61.89 (61.54)              | 4.20 (4.21) | 10.31 (10.24) | 15.74 (15.60) |
| <b>16</b> | C <sub>21</sub> H <sub>17</sub> N <sub>3</sub> O <sub>3</sub> S <sub>2</sub> (423.51)                 | 59.56 (59.52)              | 4.05 (4.13) | 9.92 (9.90)   | 15.14 (15.12) |
| <b>17</b> | C <sub>22</sub> H <sub>19</sub> N <sub>3</sub> O <sub>4</sub> S <sub>2</sub> (453.53)                 | 58.26 (58.11)              | 4.22 (4.30) | 9.27 (9.48)   | 14.14 (14.02) |
| <b>18</b> | C <sub>20</sub> H <sub>14</sub> ClN <sub>3</sub> O <sub>2</sub> S <sub>2</sub> (427.93)               | 56.13 (55.90)              | 3.30 (3.33) | 8.28 (8.20)   | 14.99 (14.89) |
| <b>19</b> | C <sub>20</sub> H <sub>13</sub> Cl <sub>2</sub> N <sub>3</sub> O <sub>2</sub> S <sub>2</sub> (462.37) | 51.95 (51.89)              | 2.83 (2.81) | 9.09 (8.89)   | 13.87 (13.80) |
| <b>20</b> | C <sub>18</sub> H <sub>13</sub> N <sub>3</sub> O <sub>2</sub> S <sub>3</sub> (399.51)                 | 54.11 (54.0)               | 3.28 (3.32) | 10.52 (10.39) | 24.08 (23.88) |
| <b>21</b> | C <sub>18</sub> H <sub>12</sub> BrN <sub>3</sub> O <sub>2</sub> S <sub>3</sub> (478.41)               | 45.19 (45.20)              | 2.53 (2.60) | 8.78 (8.65)   | 20.11 (20.01) |
| <b>23</b> | C <sub>22</sub> H <sub>16</sub> N <sub>4</sub> O <sub>4</sub> S <sub>2</sub> (464.52)                 | 56.88 (56.72)              | 3.47 (3.50) | 12.06 (11.93) | 13.81 (13.77) |
| <b>24</b> | C <sub>13</sub> H <sub>15</sub> N <sub>3</sub> S <sub>2</sub> (277.41)                                | 56.28 (56.12)              | 5.45 (5.48) | 15.15 (15.08) | 23.12 (22.97) |
| <b>26</b> | C <sub>13</sub> H <sub>15</sub> N <sub>3</sub> OS <sub>2</sub> (293.41)                               | 53.22 (53.0)               | 5.15 (5.21) | 14.32 (14.28) | 21.86 (21.72) |
| <b>27</b> | C <sub>18</sub> H <sub>17</sub> N <sub>3</sub> OS <sub>2</sub> (355.48)                               | 60.82 (60.52)              | 4.82 (4.90) | 11.82 (12.02) | 18.04 (17.88) |
| <b>28</b> | C <sub>15</sub> H <sub>15</sub> N <sub>3</sub> OS <sub>2</sub> (317.43)                               | 56.76 (56.50)              | 4.76 (4.81) | 13.24 (13.05) | 20.20 (20.18) |
| <b>29</b> | C <sub>20</sub> H <sub>17</sub> N <sub>3</sub> OS <sub>2</sub> (379.5)                                | 63.30 (63.22)              | 4.52 (4.52) | 11.07 (10.89) | 16.90 (16.88) |
| <b>30</b> | C <sub>15</sub> H <sub>15</sub> N <sub>3</sub> O <sub>2</sub> S <sub>2</sub> (333.43)                 | 54.03 (53.78)              | 4.53 (4.66) | 12.60 (12.46) | 19.23 (19.24) |
| <b>31</b> | C <sub>20</sub> H <sub>17</sub> N <sub>3</sub> O <sub>2</sub> S <sub>2</sub> (395.5)                  | 60.74 (60.77)              | 4.33 (3.32) | 10.62 (10.40) | 16.22 (16.12) |
| <b>32</b> | C <sub>29</sub> H <sub>25</sub> N <sub>3</sub> O <sub>4</sub> S <sub>2</sub> (543.66)                 | 64.07 (63.78)              | 4.64 (4.66) | 7.73 (7.65)   | 11.80 (11.75) |
| <b>33</b> | C <sub>27</sub> H <sub>19</sub> Cl <sub>2</sub> N <sub>3</sub> O <sub>2</sub> S <sub>2</sub> (552.49) | 58.70 (58.44)              | 3.47 (3.50) | 7.61 (7.56)   | 11.61 (11.60) |
